# Supplementary material
Source: PubMed Central journal article supplement (PMC5317242)
Supplement: DC152579SupplementaryData.pdf [file DC152579SupplementaryData.pdf]

SUPPLEMENTARY DATA

**Supplementary Table 1. Betas of Covariates Associated with HbA<sub>1c</sub> Levels among HCHS/SOL and NHANES participants**

| Adjustment Variables               | Betas* (95% confidence intervals) |
|------------------------------------|-----------------------------------|
| Intercept                          | 4.5661 (4.3468, 4.7855)           |
| Heritage:                          |                                   |
| Dominican                          | Ref                               |
| Central American                   | -0.0052 (-0.0427, 0.0324)         |
| Cuban                              | -0.0479 (-0.0820, -0.0139)        |
| Mexican                            | -0.0024 (-0.0336, 0.0287)         |
| Puerto Rican                       | 0.0186 (-0.0164, 0.0537)          |
| South American                     | -0.0399 (-0.0807, 0.0009)         |
| Non-Hispanic White                 | -0.1025 (-0.1397, -0.0653)        |
| Sex:                               |                                   |
| Women                              | Ref                               |
| Men                                | 0.1682 (0.1003, 0.2361)           |
| Age, years                         | 0.0093 (0.0080, 0.0105)           |
| Age*sex interaction                | -0.0035 (-0.0049, -0.0020)        |
| Body mass index, kg/m <sup>2</sup> | 0.0036 (0.0022, 0.0050)           |
| Fasting plasma glucose, mg/dL      | 0.0130 (0.0108, 0.0152)           |
| 2-hour plasma glucose, mg/dL       | 0.0020 (0.0016, 0.0023)           |
| Fasting plasma insulin, μU/mL      | 0.0007 (-0.0007, 0.0020)          |
| Hemoglobin, g/dL                   | -0.0278 (-0.0382, -0.0175)        |
| Mean corpuscular volume, fL        | -0.0068 (-0.0085, -0.0052)        |
| Systolic blood pressure, mm Hg     | -0.0003 (-0.0012, 0.0006)         |
| Diastolic blood pressure, mm Hg    | -0.0003 (-0.0014, 0.0008)         |
| Alanine aminotransferase, U/L      | 0.0007 (0.0000, 0.0014)           |
| Aspartate aminotransferase, U/L    | -0.0009 (-0.0019, 0.0000)         |
| Gamma glutamyl transferase, U/L    | 0.0001 (-0.0001, 0.0003)          |

\*Betas indicate the difference in HbA<sub>1c</sub> levels for each category of categorical variables (heritage and sex) or for each one unit higher level of continuous variables

SUPPLEMENTARY DATA

Supplementary Figure 1. All-covariate-adjusted mean HbA<sub>1c</sub> Levels\* by Racial/Ethnic/Heritage Group

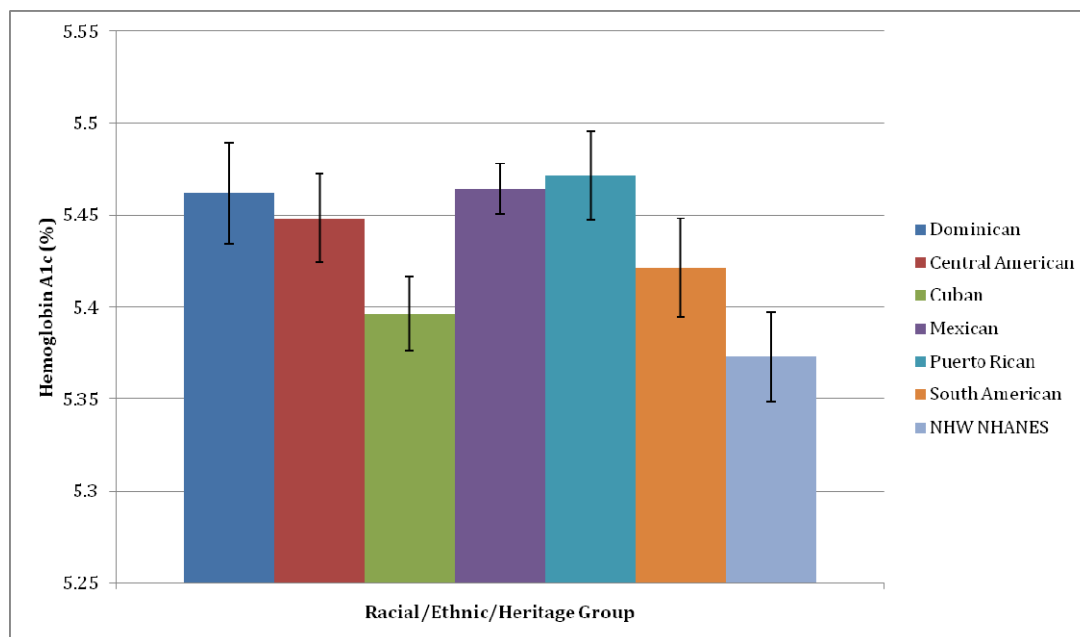

SUPPLEMENTARY DATA

**Supplementary Table 2. All-covariate-adjusted mean HbA<sub>1c</sub>\* by Racial/ Heritage Group and Diabetes Status Category**

| Diabetes Status Categories     | Hispanic Community Health Study/Study of Latinos (HCHS/SOL)<br>March 2008 – June 2011 |                                  |                     |                      |                           |                              | NHANES<br>2007-2012                        |                                    |
|--------------------------------|---------------------------------------------------------------------------------------|----------------------------------|---------------------|----------------------|---------------------------|------------------------------|--------------------------------------------|------------------------------------|
|                                | Dominican<br>(N=1,220)                                                                | Central<br>American<br>(N=1,485) | Cuban<br>(N=1,991)  | Mexican<br>(N=5,426) | Puerto Rican<br>(N=2,016) | South<br>American<br>(N=945) | All<br>Hispanics/<br>Latinos<br>(N=13,518) | Non-Hispanic<br>White<br>(N=2,242) |
| Normal Glucose Tolerance       | 5.34<br>(5.31-5.37)                                                                   | 5.33<br>(5.30-5.35)              | 5.30<br>(5.28-5.32) | 5.35<br>(5.33-5.37)  | 5.35<br>(5.33-5.38)       | 5.32<br>(5.29-5.35)          | 5.34<br>(5.33-5.35)                        | 5.26<br>(5.24-5.28)                |
| Pre-diabetes                   | 5.63<br>(5.58-5.68)                                                                   | 5.59<br>(5.55-5.63)              | 5.52<br>(5.49-5.55) | 5.60<br>(5.58-5.63)  | 5.58<br>(5.53-5.64)       | 5.56<br>(5.51-5.60)          | 5.58<br>(5.57-5.60)                        | 5.49<br>(5.45-5.53)                |
| Unrecognized Diabetes Mellitus | 6.23<br>(6.11-6.35)                                                                   | 6.32<br>(6.21-6.43)              | 6.05<br>(5.94-6.15) | 6.21<br>(6.14-6.28)  | 6.30<br>(6.18-6.42)       | 6.11<br>(5.90-6.33)          | 6.18<br>(6.14-6.23)                        | 6.17<br>(6.05-6.30)                |

Data presented as means in NGSP units, and 95% confidence intervals in parentheses. HCHS/SOL and NHANES datasets were analyzed separately. As a result, NHANES results were unadjusted.

\* Adjusted for sex, age, body mass index, fasting plasma glucose, 2-hour plasma glucose, fasting plasma insulin, hemoglobin, mean corpuscular volume, systolic blood pressure, diastolic blood pressure, alanine aminotransferase, aspartate aminotransferase, and gamma glutamyl transferase

Glycemic categories include normal glucose tolerance (FPG < 5.6 mmol/L and 2hPG < 7.8 mmol/L), pre-diabetes (FPG = 5.6-7.0 mmol/L and/or 2hPG = 7.8-11.1 mmol/L) and unrecognized diabetes mellitus (FPG ≥ 7.1 mmol/L and/or 2hPG ≥ 11.2 mmol/L).

SUPPLEMENTARY DATA

**Supplementary Table3.** Betas of Covariates Associated with HbA1c, Stratified by Dataset

| Adjustment Variables               | Hispanic Community Health Study/<br>Study of Latinos (HCHS/SOL)<br>March 2008 – June 2011 | NHANES<br>2007-2012        |
|------------------------------------|-------------------------------------------------------------------------------------------|----------------------------|
| Intercept                          | 4.7595 (4.5824, 4.9365)                                                                   | 4.5440 (4.1850, 4.9030)    |
| Heritage:                          |                                                                                           |                            |
| Dominican                          | Ref                                                                                       | Not applicable             |
| Central American                   | -0.0128 (-0.0496, 0.0239)                                                                 | Not applicable             |
| Cuban                              | -0.0646 (-0.0977, -0.0315)                                                                | Not applicable             |
| Mexican                            | 0.0032 (-0.0272, 0.0336)                                                                  | Not applicable             |
| Puerto Rican                       | 0.0100 (-0.0240, 0.0441)                                                                  | Not applicable             |
| South American                     | -0.0393 (-0.0786, 0.0001)                                                                 | Not applicable             |
| Sex:                               |                                                                                           |                            |
| Women                              | Ref                                                                                       | Ref                        |
| Men                                | 0.1513 (0.0913, 0.2113)                                                                   | 0.1356 (0.0186, 0.2527)    |
| Age, years                         | 0.0104 (0.0094, 0.0115)                                                                   | 0.0085 (0.0066, 0.0105)    |
| Age*sex interaction                | -0.0029 (-0.0042, -0.0016)                                                                | -0.0032 (-0.0056, -0.0008) |
| Body mass index, kg/m <sup>2</sup> | 0.0051 (0.0034, 0.0068)                                                                   | 0.0007 (-0.0015, 0.0030)   |
| Fasting plasma glucose, mg/dL      | 0.0123 (0.0109, 0.0136)                                                                   | 0.0140 (0.0107, 0.0173)    |
| 2-hour plasma glucose, mg/dL       | 0.0021 (0.0018, 0.0024)                                                                   | 0.0017 (0.0011, 0.0023)    |
| Fasting plasma insulin, μU/mL      | 0.0024 (0.0008, 0.0039)                                                                   | -0.0004 (-0.0024, 0.0017)  |
| Hemoglobin, g/dL                   | -0.0010 (-0.0111, 0.0091)                                                                 | -0.0194 (-0.0379, -0.0008) |
| Mean corpuscular volume, fL        | -0.0410 (-0.0463, -0.0356)                                                                | -0.0082 (-0.0115, -0.0048) |
| Systolic blood pressure, mm Hg     | -0.0012 (-0.0021, -0.0004)                                                                | 0.0003 (-0.0012, 0.0017)   |
| Diastolic blood pressure, mm Hg    | 0.0007 (-0.0006, 0.0020)                                                                  | -0.0015 (-0.0031, 0.0002)  |
| Alanine aminotransferase, U/L      | 0.0000 (-0.0006, 0.0007)                                                                  | 0.0010 (-0.0006, 0.0027)   |
| Aspartate aminotransferase, U/L    | -0.00020 (-0.0010, 0.0006)                                                                | -0.0013 (-0.0035, 0.0010)  |
| Gamma glutamyl transferase, U/L    | 0.00010 (-0.0001, 0.0003)                                                                 | -0.0001 (-0.0007, 0.0005)  |

Betas indicate the difference in HbA1c levels for each category of categorical variables (heritage and sex) or for each one unit higher level of continuous variables. HCHS/SOL and NHANES datasets were analyzed separately.

SUPPLEMENTARY DATA

**Supplementary Table 4.** Unadjusted and Adjusted Mean HbA1c (%) by Hispanic Heritage Group

| Adjustment Variables   | Hispanic Community Health Study/Study of Latinos (HCHS/SOL)<br>March 2008 – June 2011 |                               |                     |                      |                           |                           |
|------------------------|---------------------------------------------------------------------------------------|-------------------------------|---------------------|----------------------|---------------------------|---------------------------|
|                        | Dominican<br>(N=1,220)                                                                | Central American<br>(N=1,485) | Cuban<br>(N=1,991)  | Mexican<br>(N=5,426) | Puerto Rican<br>(N=2,016) | South American<br>(N=945) |
| Unadjusted             | 5.45<br>(5.41-5.49)                                                                   | 5.50<br>(5.45-5.54)           | 5.49<br>(5.46-5.53) | 5.51<br>(5.47-5.54)  | 5.51<br>(5.48-5.54)       | 5.46<br>(5.42-5.49)       |
| Sex                    | 5.45<br>(5.41-5.49)                                                                   | 5.50<br>(5.45-5.54)           | 5.49<br>(5.46-5.53) | 5.51<br>(5.47-5.54)  | 5.51<br>(5.47-5.54)       | 5.46<br>(5.42-5.49)       |
| Age                    | 5.48<br>(5.44-5.52)                                                                   | 5.51<br>(5.47-5.56)           | 5.42<br>(5.39-5.45) | 5.54<br>(5.51-5.58)  | 5.50<br>(5.47-5.52)       | 5.42<br>(5.39-5.46)       |
| Age*sex<br>interaction | 5.49<br>(5.45-5.53)                                                                   | 5.51<br>(5.47-5.56)           | 5.42<br>(5.39-5.44) | 5.54<br>(5.51-5.58)  | 5.49<br>(5.47-5.52)       | 5.42<br>(5.39-5.46)       |
| BMI                    | 5.45<br>(5.40-5.49)                                                                   | 5.50<br>(5.46-5.55)           | 5.50<br>(5.46-5.53) | 5.51<br>(5.48-5.54)  | 5.48<br>(5.45-5.51)       | 5.48<br>(5.45-5.52)       |
| FPG and<br>2hPG        | 5.47<br>(5.44-5.49)                                                                   | 5.45<br>(5.42-5.47)           | 5.43<br>(5.40-5.45) | 5.44<br>(5.43-5.46)  | 5.49<br>(5.47-5.52)       | 5.43<br>(5.40-5.46)       |
| FPI                    | 5.47<br>(5.43-5.51)                                                                   | 5.49<br>(5.45-5.53)           | 5.48<br>(5.45-5.52) | 5.51<br>(5.47-5.54)  | 5.50<br>(5.47-5.53)       | 5.47<br>(5.43-5.51)       |
| Hemoglobin             | 5.44<br>(5.40-5.49)                                                                   | 5.50<br>(5.45-5.54)           | 5.49<br>(5.46-5.53) | 5.50<br>(5.47-5.54)  | 5.50<br>(5.47-5.54)       | 5.46<br>(5.42-5.49)       |
| MCV                    | 5.43<br>(5.39-5.47)                                                                   | 5.49<br>(5.45-5.54)           | 5.50<br>(5.46-5.53) | 5.51<br>(5.48-5.54)  | 5.50<br>(5.47-5.53)       | 5.46<br>(5.42-5.49)       |
| SBP and DBP            | 5.44<br>(5.40-5.48)                                                                   | 5.49<br>(5.44-5.53)           | 5.46<br>(5.42-5.49) | 5.53<br>(5.50-5.57)  | 5.49<br>(5.46-5.52)       | 5.47<br>(5.44-5.50)       |
| ALT, AST,<br>GGT       | 5.47<br>(5.43-5.51)                                                                   | 5.49<br>(5.44-5.53)           | 5.49<br>(5.45-5.52) | 5.50<br>(5.47-5.54)  | 5.51<br>(5.47-5.54)       | 5.46<br>(5.43-5.50)       |
| All covariates         | 5.46<br>(5.43-5.49)                                                                   | 5.45<br>(5.42-5.47)           | 5.40<br>(5.38-5.42) | 5.46<br>(5.45-5.48)  | 5.47<br>(5.45-5.50)       | 5.42<br>(5.40-5.45)       |

Data presented as means in NGSP units, and 95% confidence intervals in parentheses. HCHS/SOL and NHANES datasets were analyzed separately.

Abbreviation for variables: BMI = body mass index, FPG = fasting plasma glucose, 2hPG = plasma glucose in 2-h OGTT, FPI = fasting plasma insulin, MCV = mean corpuscular volume, SBP = systolic blood pressure, DBP = diastolic blood pressure, ALT = alanine aminotransferase, AST = aspartate aminotransferase, and GGT = gamma glutamyl transferase
